# Supplementary material
Source: ML conference proceedings conference paper supplement (https://openaccess.thecvf.com/content/ICCV2021/html/Yin_3DStyleNet_Creating_3D_ICCV_2021_paper.html)
Supplement: Supplementary file 1 [file Yin_3DStyleNet_Creating_3D_ICCV_2021_supplemental.zip]

Archive with 2 entries (2 files):
- supp.pdf
- supp.mp4
